# Supplementary material for: Thermal Behavior and Pyrolysis Kinetics of Mushroom Residue with the Introduction of Waste Plastics
Source: MDPI journal article supplement (doi:10.3390/polym15183824), 2023-09-19
Supplement: s1 [file s1]

## Supplementary materials

**Table S1 Sample preparation**

| Sample name | Types of plastics | Ratio of MR and PE | Mass of MR (g) | Mass of plastics (g) |
|-------------|-------------------|--------------------|----------------|----------------------|
| MR/PE-5:1   | PE                | 5:1                | 5              | 1                    |
| MR/PE-2:1   |                   | 2:1                | 4              | 2                    |
| MR/PE-1:1   |                   | 1:1                | 3              | 3                    |
| MR/PE-1:2   |                   | 1:2                | 2              | 4                    |
| MR/PE-1:5   |                   | 1:5                | 1              | 5                    |
| MR/PP-1:1   | PP                | 1:1                | 3              | 3                    |
| MR/PET-1:1  | PET               | 1:1                | 3              | 3                    |

**Table S2 Samples for thermogravimetric analysis**

|            | Heating rate (°C/min) | Name of sample       |
|------------|-----------------------|----------------------|
| MR         | 10                    | MR-10 °C/min         |
| PE         |                       | PE-10 °C/min         |
| PP         |                       | PP-10 °C/min         |
| PET        |                       | PET-10 °C/min        |
|            |                       |                      |
|            | 10                    | MR/PE-1:1-10 °C/min  |
|            | 20                    | MR/PE-1:1-20 °C/min  |
| MR/PE-1:1  | 30                    | MR/PE-1:1-30 °C/min  |
|            | 40                    | MR/PE-1:1-40 °C/min  |
| MR/PE-5:1  | 10                    | MR/PE-5:1-10 °C/min  |
| MR/PE-2:1  |                       | MR/PE-2:1-10 °C/min  |
| MR/PE-1:2  |                       | MR/PE-1:2-10 °C/min  |
| MR/PE-1:5  |                       | MR/PE-1:5-10 °C/min  |
| MR/PP-1:1  |                       | MR/PEP-1:1-10 °C/min |
| MR/PET-1:1 |                       | MR/PET-1:1-10 °C/min |

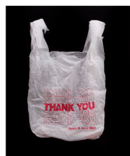

Plastic bags

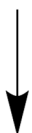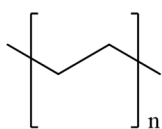

Polyethylene (PE)

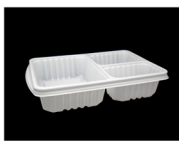

Plastic lunch boxes

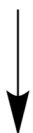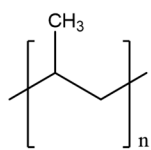

Polypropylene (PP)

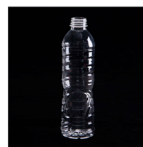

Plastic bottles

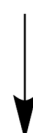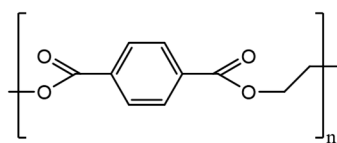

Polyethylene terephthalate (PET)

**Figure S1. Chemical structure of PE, PP and PET.**
